# Supplementary material
Source: HighWire-hosted journal article supplement (https://jaha.ahajournals.org/content/6/4/e004877)
Supplement: inline-supplementary-material-1 [file inline-supplementary-material-1.pdf]

## **SUPPLEMENTAL MATERIAL**

**Table S1. Outcome at 1 year follow-up, per patient**

| Status after 1 year                         | PTA±BMS (N=64) | DES (N=73) |
|---------------------------------------------|----------------|------------|
| Alive without amputation or re-intervention | 38 (59.4)      | 47 (64.4)  |
| Major amputation                            | 7 (10.9)       | 5 (6.8)    |
| Re-intervention                             | 3 (4.7)        | 3 (4.1)    |
| Amputation and death                        | 4 (6.3)        | 3 (4.1)    |
| Re-intervention and death                   | 0              | 1 (1.4)    |
| Re-intervention, amputation and death       | 1 (1.6)        | 0          |
| Death                                       | 11 (17.2)      | 14 (19.2)  |

$P = 0.78 (\chi^2)$ .

BMS indicates bare metal stent; DES, drug-eluting stent; and PTA, percutaneous transluminal angioplasty. Values are N (%).

**Table S2. Outcome at 2 years follow-up, per patient**

| Status after 2 years                        | PTA±BMS (N=64) | DES (N=73) |
|---------------------------------------------|----------------|------------|
| Alive without amputation or re-intervention | 26 (40.6)      | 42 (57.5)  |
| Major amputation                            | 8 (12.5)       | 3 (4.1)    |
| Re-intervention                             | 5 (7.8)        | 4 (5.5)    |
| Amputation and death                        | 5 (7.8)        | 6 (8.2)    |
| Re-intervention and death                   | 0              | 1 (1.4)    |
| Re-intervention, amputation and death       | 1 (1.6)        | 0          |
| Death                                       | 19 (29.7)      | 17 (23.3)  |

$P = 0.25 (\chi^2)$

BMS indicates bare metal stent; DES, drug-eluting stent; and PTA, percutaneous transluminal angioplasty. Values are N (%).

**Table S3. Outcome at 3 years follow-up, per patient**

| Status after 3 years                        | PTA±BMS (N=64) | DES (N=73) |
|---------------------------------------------|----------------|------------|
| Alive without amputation or re-intervention | 21 (32.8)      | 35 (47.9)  |
| Major amputation                            | 8 (12.5)       | 4 (5.5)    |
| Re-intervention                             | 4 (6.3)        | 4 (5.5)    |
| Amputation and death                        | 5 (7.8)        | 6 (8.2)    |
| Re-intervention and death                   | 1 (1.6)        | 1 (1.4)    |
| Re-intervention, amputation and death       | 1 (1.6)        | 0          |
| Death                                       | 23 (35.9)      | 22 (30.1)  |
| Lost to follow-up                           | 1 (1.6)        | 1 (1.4)    |

$P = 0.61 (\chi^2)$

BMS indicates bare metal stent; DES, drug-eluting stent; and PTA, percutaneous transluminal angioplasty. Values are N (%).

**Table S4. Outcome at 4 years follow-up, per patient**

| Status after 4 years                        | PTA±BMS (N=64) | DES (N=73) |
|---------------------------------------------|----------------|------------|
| Alive without amputation or re-intervention | 12 (18.8)      | 29 (39.7)  |
| Major amputation                            | 7 (10.9)       | 1 (1.4)    |
| Re-intervention                             | 2 (3.1)        | 4 (5.5)    |
| Amputation and death                        | 5 (7.8)        | 7 (9.6)    |
| Re-intervention and death                   | 1 (1.6)        | 1 (1.4)    |
| Re-intervention, amputation and death       | 1 (1.6)        | 0          |
| Death                                       | 29 (45.3)      | 24 (32.9)  |
| Lost to follow-up                           | 1 (1.6)        | 2 (2.7)    |
| Follow-up ongoing                           | 4 (6.3)        | 3 (4.1)    |
| Amputation, follow-up ongoing               | 2 (3.1)        | 2 (2.7)    |

$P=0.12 (\chi^2)$

BMS indicates bare metal stent; DES, drug-eluting stent; and PTA, percutaneous transluminal angioplasty. Values are N (%).

**Table S5. Outcome at 5 years follow-up, per patient**

| Status after 5 years                        | PTA±BMS (N=64) | DES (N=73) |
|---------------------------------------------|----------------|------------|
| Alive without amputation or re-intervention | 8 (12.5)       | 11 (15.1)  |
| Major amputation                            | 5 (7.8)        | 2 (2.7)    |
| Re-intervention                             | 1 (1.6)        | 3 (4.1)    |
| Amputation and death                        | 5 (7.8)        | 7 (9.6)    |
| Re-intervention and death                   | 1 (1.6)        | 2 (2.7)    |
| Re-intervention, amputation and death       | 1 (1.6)        | 0          |
| Death                                       | 31 (48.4)      | 32 (43.8)  |
| Lost to follow-up                           | 1 (1.6)        | 4 (5.5)    |
| Follow-up ongoing                           | 5 (7.8)        | 9 (12.3)   |
| Re-intervention, follow-up ongoing          | 1 (1.6)        | 1 (1.4)    |
| Amputation, follow-up ongoing               | 5 (7.8)        | 2 (2.7)    |

$P=0.63$  ( $\chi^2$ )

BMS indicates bare metal stent; DES, drug-eluting stent; and PTA, percutaneous transluminal angioplasty. Values are N (%).
